1 Long title: **Education influences knowledge about environmental issues in Washington, DC, USA**

2 Short title: **Education and environmental knowledge**

3

4 **Matthew L. Richardson\***, Ashley D. Milton and Elgloria Harrison

5

6 College of Agriculture, Urban Sustainability and Environmental Sciences, University of the District of

7 Columbia, Washington, DC, USA.

8 \*E-mail: [matthew.richardson@udc.edu](mailto:matthew.richardson@udc.edu)

9 **ABSTRACT**

10 We predicted that demographic differences in Washington, DC's population would influence people's  
11 knowledge and perceptions about the interconnectedness of natural resources, climate change,  
12 economics, and socio-cultural well-being, so we conducted surveys over three years to test that  
13 prediction. We collected demographic data from 455 participants and asked them 26  
14 questions/statements related to natural resources, climate change, economics, and health. We selected  
15 education as the focal demographic category and participants were categorized based on their level of  
16 educational attainment: 1) completion of high school or less (hereafter "high school"); 2) some trade  
17 school or university education beyond high school up to and including completion of a trade school,  
18 two-, or four-year degree (hereafter "post-high school"); and 3) completion of a Master's, professional,  
19 or doctoral degree (hereafter "advanced education"). Answers to 14 of the 26 survey questions were  
20 dissimilar across educational groups. People with advanced education reported the highest connection  
21 with the natural community and were more likely to report that their personal welfare depended on the  
22 natural community. Participants in the high school group were more likely to believe that humans do  
23 not have much influence on natural resources and placed more trust in technology and human  
24 achievements to control nature and ensure that earth will not become unlivable. Compared to those  
25 with education beyond high school, those with a high school education were more likely to express an  
26 interest in local environmental concerns over global, jobs over natural resources, and effects of  
27 degraded local natural resources on income, health, and the environment instead of on cultural/social  
28 practices, neighborhood aesthetics, and recreation. The results suggest ways in which educational  
29 information and engagement in environmental issues should be targeted for stakeholders of different  
30 educational background in order to increase knowledge and build effective partnerships that find  
31 solutions for environmental problems.

## 32 INTRODUCTION

33 Only 14% of the world's population lived in cities in 1900, but now over 50% live in cities and this  
34 percentage is expected to reach 66% by 2050 [1]. The United States of America (USA) has an even higher  
35 urban population than the world average: over 80% live in urban areas [2]. The urbanization of the  
36 human population is happening simultaneously with worsening local and global environmental  
37 problems, such as overexploitation and degradation of natural resources [3-4], population declines and  
38 extinctions of other species [5-6], and climate change [7]. These environmental problems are  
39 interrelated in often complex ways and have the potential to influence neighborhood aesthetics and a  
40 person's economic well-being, health, cultural and social practices, and recreation [8-9]. Whereas  
41 environmental knowledge does not necessarily lead people to take pro-environmental actions, tackling  
42 environmental, and related economic, social, and cultural, problems may be more challenging if the  
43 general public is under- or uneducated about the problems [10-12].

44 Cities can have a profound influence on natural resources and pollution within a region as well  
45 as globally, which in turn can negatively affect human well-being [13-15]. Therefore, effective solutions  
46 for sustainably using natural resources, curtailing climate change, and improving the lives of people  
47 must consider the role that cities can play [8, 16-17]. Some city governments have been more proactive  
48 than others in addressing environmental problems and the well-being of the city's inhabitants. For  
49 example, London (UK) and Beijing (China) have made efforts to electrify transportation, including public  
50 buses and taxis, in order to improve air quality [18] and Portland, Oregon is considered one of the most  
51 advanced cities in the USA for climate planning because they have been conducting work on mitigation  
52 since the 1990s [19]. Characteristics of proactive cities include a political culture that embraces  
53 mitigation, a general public that has an awareness of environmental problems and advocates that their  
54 political leaders act, and local experts that engage with government agencies [19].

55 Washington, DC is the capital of the USA and its District government has plans for sustainability,  
56 improving air quality, adapting to climate change, reducing the government's carbon footprint, and  
57 protecting wildlife and watersheds [20-21]. The District government also commissioned a study on the  
58 linkage between urban heat islands and poor health [22]. These plans and studies may indicate that  
59 Washington, DC has the characteristics of a proactive city because they seek to identify and mitigate  
60 environmental problems and the associated impacts on people. However, little is known about  
61 environmental knowledge and perceptions of residents in the Washington, DC area. Globally,  
62 environmental knowledge and action are often correlated with demographic characteristics, such as  
63 education, age, gender, and place of residence[23-26], and participation in group organizations [12].

64 Washington, DC has an extremely diverse population, there are large disparities among the  
65 population in education, employment, income, health, and overall well-being [27], and distribution of  
66 natural, manmade, and financial resources is unequal [21, 28]. Washington, DC is divided into eight  
67 Wards, and people who live in eastern and eastern-central Wards typically have fewer resources, less  
68 education, higher unemployment, lower income, and a higher rate of poor health indicators, such as  
69 obesity, diabetes, heart disease, and a shorter lifespan, than those in western and western-central  
70 Wards [27]. The population is also largely African American in the east and becomes predominantly  
71 Caucasian in the west. We predicted that demographic differences in Wards throughout Washington, DC  
72 would influence people's knowledge and perceptions about the interconnectedness of natural  
73 resources, climate change, economics, and socio-cultural well-being, so we conducted surveys over  
74 three years to test that prediction. Understanding what people know and perceive, and which  
75 demographic characteristics may influence knowledge and perceptions, is key to designing effective  
76 educational programs, engaging in collective conversations, and building effective partnerships that find  
77 solutions for environmental problems and benefit the community.

78

## 79    **METHODS**

80    The survey included five demographic questions (i.e., age, education, ethnicity, gender, and place of  
81    primary residence), and 26 open-ended, close-ended, and Likert scale questions/statements (hereafter  
82    “questions”) to assess knowledge and perceptions of the participants (Table 1, 2, 3). Some questions  
83    were duplicated or adapted from the connectedness-to-nature-scale [29]. We also included a question  
84    about whether the District government was spending the appropriate amount on health, workforce  
85    development, education, protecting natural resources, developing natural resources, law enforcement,  
86    and drug rehabilitation to see what people thought about spending for natural resources compared to  
87    other priority areas (Table 3). We loaded the survey into the iSurvey app (Harvest Your Data, Wellington,  
88    New Zealand) and trained undergraduate students in our classes at the University of the District of  
89    Columbia to conduct face-to-face interviews during each fall semester from 2016-2018. We canvassed  
90    11 neighborhoods in Washington, DC’s eight Wards and solicited participants at transit stations,  
91    businesses, libraries, homes, and along sidewalks. Participants were adults ( $\geq 18$  years old) and were  
92    selected because of their presence in the area only and without regard to any demographic category. In  
93    total, 455 completed surveys were collected. A survey was considered complete once a participant was  
94    read the final question, but it was not mandatory for the participants to answer every question.

95            Some demographic variables were potentially correlated (e.g., people in some Wards are also  
96    likely from a certain ethnic group), so they were not all independent variables. Therefore, we ran  
97    preliminary analyses using separate  $\chi^2$  contingency tests to determine whether the responses to two  
98    questions differed according to age, education, ethnicity, gender, and place of primary residence. We  
99    selected education as the focal demographic category because preliminary analyses found strong  
100   differences in response to the statement that “human activities have little influence on natural  
101   resources” ( $P < 0.05$ ), whereas no strong differences in responses were found across other demographic  
102   variables ( $P > 0.05$ ).

103 Participants were categorized into one of three groups based on their level of educational  
104 attainment: 1) completion of high school or less (hereafter “high school”) (n = 177); 2) some trade  
105 school or university education beyond high school up to and including completion of a trade school,  
106 two-, or four-year degree (hereafter “post-high school”) (219); and 3) completion of a Master’s,  
107 professional, or doctoral degree (hereafter “advanced education”) (n = 59).

108 There were four open-ended questions that probed participants’ perceptions of natural  
109 resources (Table 1). We coded answers to each open-ended question in order to reduce all responses to  
110 a limited number of categories. These response categories were analyzed using  $\chi^2$  contingency tests to  
111 determine whether the responses differed among educational groups. Answers to the question “Can  
112 you describe what natural resources are?” were coded to fit into four categories: natural resources,  
113 creation, recycling, and none (Table 1). When the participant gave an example of a natural resource,  
114 such as air, water, trees, land, this indicated that they understood what natural resources are and their  
115 response was coded as “natural resources.” Participants’ answers that included terms such as God or  
116 biblical phrases were coded as “creation.” Answers that indicated a reuse or recycling of materials for  
117 financial gain were coded as “recycling.” Finally, responses that indicated that the participants were  
118 unable to answer the question were coded as “no.” Answers to the questions “What do you consider to  
119 be the most important natural resource?” and “Which natural resources has been threatened the most  
120 in your neighborhood?” were coded to fit into eight categories: air, water, soil, trees, land, energy/fossil  
121 fuels, multiple resources, and other (Table 1). Participants’ answers that included oil, fossil fuel, coal,  
122 and gas were coded as “energy/fossil fuels.” Participants’ answers that included more than one natural  
123 resource were coded as “multiple resources.” The “other” category includes natural resources that were  
124 infrequently mentioned, such as food, and resources that were not natural, such as education and  
125 transportation. Answers to the question “Can you describe what climate change is to you?” were coded  
126 to fit into four categories: weather patterns, human cause/reaction, climate change, and no.

127 Participants' answers that included weather change, temperature change, hotter or colder weather, or  
128 similar statements were coded as "weather patterns." Participants' answers that voiced a human cause  
129 or invoked a human emotion, such as scary or fear, were coded as "human cause/reaction."  
130 Participants' answers that included climate change causes or effects (not including weather), such as  
131 global warming, carbon emissions, greenhouse gases, and sea level rise, were coded as "climate  
132 change." Finally, responses that indicated that the participants were unable to answer the question  
133 were coded as "no."

134 We also used separate  $\chi^2$  contingency tests to determine whether the responses to the other 22  
135 questions differed among educational groups. Sample size was sometimes fewer than the total number  
136 of participants previously reported when a participant did not answer a question.

137

## 138 **RESULTS**

139 Participants across the three educational groups answered 14 questions dissimilarly (see Tables 1 and 2  
140 for data supporting the results in this paragraph). Over 84% of participants in the post-high school and  
141 advanced education groups were able to describe natural resources, whereas fewer than 67% of  
142 participants in the high school group were able to do so. Participants in the high school group were  
143 more likely to discuss recycling of materials for financial gain when asked to describe natural resources.  
144 Over 60% of all participants discussed weather patterns when asked to describe climate change, but  
145 those with advanced degrees or post-high school education also discussed other causes and effects of  
146 climate change, whereas a greater percentage of those in the high school group were unable to describe  
147 climate change. Over 80% of participants with advanced education somewhat or strongly agreed that  
148 they think of the natural world as a community to which they belong, but only slightly over half of the  
149 other participants agreed with this question. Similarly, those with advanced education were less likely to  
150 feel disconnected from nature than other participants. Whereas over 70% of those with advanced

151 education somewhat or strongly disagreed that their personal welfare is not connected to the welfare of  
152 the natural world, fewer than 60% and 42% of participants in the post-high school and high school  
153 groups, respectively, felt similarly. A relatively low percentage of participants with an advanced (15.2%)  
154 or post-high school education (20.1%) somewhat or strongly agreed that human activities have little  
155 influence on natural resources, whereas 42.6% of participants in the high school group somewhat or  
156 strongly agreed with this question. Those with the lowest educational attainment were also most likely  
157 to somewhat or strongly agree that technological advances will ensure that we do not make the earth  
158 unlivable (48.6% of the high school group versus 28.8-31.5% of other participants). Those with a post-  
159 high school or high school education were more likely to strongly agree that humans are severely  
160 abusing the environment than those with an advanced education, but 84.8% of those with an advanced  
161 education selected that they somewhat or strongly agreed with this question compared to 72.9-80.4%  
162 of other participants. Participants in the high school group were more likely to somewhat or strongly  
163 agree that local environmental concerns are more important than global concerns (43% versus 23.7-  
164 28.8% of participants with post-high school and advanced education). Participants with a post-high  
165 school or high school education were more likely than those with an advanced education to strongly  
166 agree that earth has plenty of natural resources if we just learn how to develop them. Those in the high  
167 school group were also more likely than other participants to strongly agree that humans will eventually  
168 learn enough about how nature works to be able to control it and to somewhat or strongly agree that  
169 there is there is too much worry about natural resources and not enough about jobs. Those with an  
170 advanced education were over twice as likely to be a member of a community organization or faith-  
171 based group than all other participants.

172 Participants were asked whether degraded natural resources in their neighborhood had a  
173 negative impact on income, health, environment, cultural/social practices, neighborhood aesthetics, and  
174 recreation (see Table 2 for data supporting the results in this paragraph). More than two-thirds of



175 participants with an advanced education selected that local degraded natural resources negatively  
176 impacted all of these except income. Income was selected by fewer than a third of participants with an  
177 advanced education. Those in the post-high school group felt less strongly than those in the advanced  
178 education group that degraded natural resources had an impact on these categories; however, more  
179 than half still thought that local degraded natural resources negatively impacted health, environment,  
180 neighborhood aesthetics, and recreation. Participants in the high school group felt less strongly than all  
181 other participants that local degraded natural resources impact these categories, except for income.  
182 More than half of these participants said that degraded natural resources negatively impacted income.  
183 Health and the environment were the other two categories where more than half of those in the high  
184 school group said that local degraded natural resources had a negative impact.

185 Participants across all educational groups answered 12 questions similarly (see Tables 1 and 2  
186 for data supporting the results in this paragraph). All participants most frequently mentioned water as  
187 the most important natural resource and the one most threatened in their neighborhood, followed by  
188 air. Participants were more likely to agree that they had a strong knowledge of natural resources than  
189 disagree, but the most common answer was “neutral.” Participants frequently selected “neutral” to the  
190 statement that natural resources in their neighborhood cannot support more people, with participants  
191 with advanced education somewhat disagreeing with this statement and all others somewhat agreeing.  
192 Participants also selected “neutral” most frequently to the statement that natural resources in their  
193 neighborhood are plentiful. Over 66% of participants somewhat or strongly agreed that if things  
194 continue on their present course, we will soon experience an environmental catastrophe, over 55%  
195 somewhat or strongly agreed that climate change negatively impacts natural resources in their  
196 neighborhood, and over 70% somewhat or strongly agreed that they understand that the natural  
197 environment impacts their health. Over one-third of participants thought individuals had the most  
198 responsibility to improve natural resources, followed by government entities (federal or district

199 government). Businesses, environmental groups, and community organizations were less frequently  
200 selected. Approximately half the participants reported spending time outdoors frequently (5 days per  
201 week) or almost daily, although those that belong to a faith-based or community organization said their  
202 organization was outdoors infrequently (once per week).

203 Participants were also in agreement about spending by Washington, DC's government and most  
204 frequently thought the government was spending "too little" on each of the seven priority areas (Table  
205 3). All participants were especially likely to say that District government spends too little on education  
206 (>60% of participants). Those in the high school group were also especially likely to say that too little  
207 was spent on health (62.1% of participants). Over 54% of all participants thought District government  
208 spent too little on protecting natural resources and over 46% thought too little was spent on developing  
209 natural resources. Law enforcement was the priority area for which participants were least likely to say  
210 that spending was too little.

211

## 212 **DISCUSSION**

213 People in Washington, DC had some similar knowledge and perceptions about the interconnectedness  
214 of natural resources, climate change, economics, and socio-cultural well-being. Whereas survey  
215 participants did not report having a strong knowledge about natural resources, most were able to define  
216 natural resources, listed water and air as the natural resources that they were most concerned about,  
217 indicated that the natural environment affects health, and reported that climate change negatively  
218 impacts natural resources. What created similar knowledge and perceptions among participants is  
219 unknown, but could be due to shared experiences, such as lived experiences and exposure to these  
220 issues through education and the media, and/or shared values. In fact, nationally in the USA there has  
221 been an increased awareness and concern about at least one major environmental issue: climate change  
222 [30]. A national survey about climate change found that people are increasingly discussing it with family

223 and friends, regularly exposed to it in the media, and reporting that they feel the effects of climate  
224 change and are harmed by them [30]. The participants in the national survey also expressed worry  
225 about extreme weather events, especially those pertaining to water, such as flooding, drought, and  
226 shortages [30]. Some of the similarities among participants in our survey in Washington, DC may be part  
227 of the shifting attitudes and knowledge happening on a national scale. Additionally, the “biospheric  
228 (concern for environment)” and “altruistic (concern for others and intrinsic value)” value orientations  
229 influence responses to environmental issues and climate change [31], so the people in Washington, DC  
230 may have similar values.

231         Despite some similarities among survey participants, educational attainment, as we predicted,  
232 influenced people’s knowledge and perceptions about the interconnectedness of natural resources,  
233 climate change, economics, and socio-cultural well-being. Whereas most participants could describe  
234 natural resources, a large percentage of those in the high school group could not. People with an  
235 advanced education showed a greater understanding of climate change and its impacts, which is  
236 consistent with a global survey that found that educational attainment was the strongest predictor of  
237 awareness about climate change [32]. Those with an advanced degree were also most likely to report  
238 that their personal welfare depends on the natural community and reported the highest connection  
239 with the natural community. Connection to nature is often correlated with time spent outdoors [33], but  
240 we found that time spent outdoors was similar across educational groups. We speculate that the type of  
241 activities engaged in outdoors are more likely to result in a greater feeling of connectedness-to-nature  
242 than the amount of time. We base this speculation on the fact that those with an advanced degree were  
243 most likely to report that degraded natural resources impacted their recreation, which may indicate that  
244 outdoor activities are more commonly recreational with this educational group compared to other  
245 groups.

246           People in the high school group were most likely to believe that humans do not have much  
247 influence on natural resources and placed more trust in technology and human achievements to control  
248 nature and ensure that earth will not become unlivable; beliefs that are not uncommon [34], but likely  
249 incorrect without concurrent changes to population growth and resource exploitation [35]. Compared to  
250 those with education beyond high school, those with a high school education were also most likely to  
251 express an interest in local environmental concerns over global, jobs over natural resources, and effects  
252 of degraded local natural resources on income, health, and the environment instead of on  
253 cultural/social practices, neighborhood aesthetics, and recreation. Education is correlated with  
254 employment and income, with unemployment declining and income increasing with educational  
255 attainment [36], which may explain why those with no education beyond high school are more  
256 concerned about the local environment and its impact on jobs, income, and health. Vulnerable and  
257 marginalized people, such as those who are undereducated, poor, in a minority racial or ethnic group,  
258 and/or an immigrant are also disproportionately afflicted by climate change, a degraded environment,  
259 and environmental hazards [37-40], so they may be more acutely aware of the local environment and its  
260 effects on prosperity and well-being.

261           People afflicted by poor ecosystem health and degradation of natural resources need  
262 educational opportunities, tools of empowerment to change their circumstances, and employment that  
263 affords them to the choice to relocate or adapt, such as jobs in the clean energy sector. Results from the  
264 survey suggest topics that could be emphasized through formal educational classes, cooperative  
265 extension programs, traditional media, social media, and other platforms in order to increase knowledge  
266 about environmental issues and their interrelationship with economics and socio-cultural well-being. For  
267 example, understanding of natural resources is lower than climate change among all survey participants  
268 and fewer than half the participants reported having a strong knowledge of natural resources, so natural  
269 resources could be emphasized. Understanding of environmental issues, the influence of people on

270 natural resources, and the connection between the natural world and their personal welfare is lower in  
271 people who have not had schooling beyond high school. Since as many as one-quarter of students  
272 graduating from high school in the USA are completing a science curriculum that is below standard [41],  
273 the deficiencies in knowledge may stem, in part, from lack of exposure in primary and secondary school.  
274 The deficiencies could be addressed by providing opportunities for education. However, we found that  
275 some environmental knowledge was relatively high even among the less educated group, which is  
276 consistent with previous studies that show high awareness of environmental risks and support for  
277 environmental protections regardless of education and across racial groups that may, on average, be  
278 less educated than Caucasians [42-45].

279         Beyond education that creates awareness of environmental issues, people from diverse groups  
280 must be given tools of empowerment that enable them to change their circumstances and demonstrate  
281 pro-environmental actions, such as advocating for environmental policies. One way in which to  
282 empower people is to recruit them into active roles in group organizations. Globally, environmental  
283 knowledge and action are often correlated with participation in group organizations [12] and  
284 participants in our study with an advanced degree generally had high environmental knowledge and  
285 reported higher involvement in community or faith-based organizations. Ensuring that people with  
286 lower educational attainment have equal opportunities to participate in group organizations may help  
287 close the gap in environmental knowledge, provide a tool of empowerment to change their  
288 circumstances and take pro-environmental actions. Mainstream environmental organizations have a low  
289 percentage of non-white minorities on their staff [46] and the term “environmentalist” is associated  
290 with well-educated and white people by minorities and Caucasians alike [45], so structural and  
291 psychological barriers currently prevent diverse participation and representation.

292         Our results suggest that those wishing to lead collective conversations and build effective  
293 partnerships that find solutions for environmental problems need to take the demographics of their

294 stakeholders into account. Stakeholders with advanced degrees may be likely to think and act more  
295 globally and show more of an interest in curtailing environmental problems that have a negative impact  
296 on their recreation, neighborhood aesthetics, and cultural/social practices. However, engaging  
297 stakeholders with a high school education means shifting focus to local concerns and issues that have a  
298 more immediate impact on their jobs and income. People with lower incomes will more likely want to  
299 discuss mitigation and adaptation measures in their neighborhoods, such as improved emergency alerts,  
300 access to government subsidies for air conditioners and energy-efficient appliances, stronger buildings  
301 that withstand extreme weather, and more local agriculture and community gardens [47]. The negative  
302 impacts of a degraded environment on health and the environment, especially air and water, are  
303 common concerns that would likely be of interest to most of the population in Washington, DC,  
304 regardless of their educational attainment. So, for example, increasing awareness among the population  
305 in Washington, DC that degradation of the environment promotes poor air quality, which exacerbates  
306 chronic illnesses, may prompt people to want to more thoroughly understand natural resources and  
307 climate change. The survey participants indicated that individuals, followed by government entities,  
308 have the greatest responsibility to improve local natural resources, so people should be empowered to  
309 engage in the process of improving a degraded environment and taught how to advocate for changes  
310 within the government.

311

## 312 **ACKNOWLEDGMENTS**

313 We thank the hundreds of survey participants, the dozens of students who helped interview survey  
314 participants, and Caitlin Arlotta, Jennifer Bennett-Mintz, Jenifer Gonzalez, and Elizabeth Jewett for  
315 facilitating some interview sessions. This project was partially funded by USDA Joint Venture Agreement  
316 15-JV-11242306-076 between the USDA Northeast Climate Hub and the University of the District of  
317 Columbia.

318

319 **REFERENCES**

320 1. United Nations. World urbanization prospects. Department of Economic and Social Affairs.

321 Population Division. 2014 [cited 2019 September 11] Available from:

322 <http://www.un.org/en/development/desa/news/population/world-urbanization-prospects->

323 [2014.html](http://www.un.org/en/development/desa/news/population/world-urbanization-prospects-2014.html)

324

325 2. United States Census Bureau. Growth in urban population outpaces rest of nation. U.S. Department

326 of Commerce, U.S. Census Bureau, Washington, DC, USA. 2012 [cited 2019 September 11] Available

327 from: [https://www.census.gov/newsroom/releases/archives/2010\\_census/cb12-50.html](https://www.census.gov/newsroom/releases/archives/2010_census/cb12-50.html)

328

329 3. Gleeson T, Wada Y, Bierkens MFP, van Beek LPH. Water balance of global aquifers revealed by

330 groundwater footprint. *Nature*. 2012; 488: 197–200.

331

332 4. Ye Y, Gutierrez NL. Ending fishery overexploitation by expanding from local successes to globalized

333 solutions. *Nat Ecol Evol*. 2017; 1:0179.

334

335 5. Dirzo R, Young HS, Galetti M, Ceballos G, Isaac NJ, Collen B. Defaunation in the Anthropocene.

336 *Science*. 2014; 345: 401–406.

337

338 6. Hallmann CA, Sorg M, Jongejans E, Siepel H, Hofland N, Schwan H, Stenmans W, Müller A, Sumser H,

339 Hörren T, Goulson D, de Kroon H. More than 75 percent decline over 27 years in total flying insect

340 biomass in protected areas. *PLOS ONE*. 2017; 12:e0185809.

341

- 342 7. Stocker TF, Qin D, Plattner G-K, Tignor M, Allen SK, Boschung J, Nauels A, Xia Y, Bex V, Midgley PM,  
343 editors. Climate change 2013: the physical science basis. Contribution of working group I to the fifth  
344 assessment report of the Intergovernmental Panel on Climate Change. Cambridge: Cambridge  
345 University Press; 2014.
- 346
- 347 8. McDonald RI. Conservation for cities. How to plan and build natural infrastructure. Washington, DC:  
348 Island Press; 2015.
- 349
- 350 9. Romm J. Climate change: what everyone needs to know. New York: Oxford; 2016.
- 351
- 352 10. Kollmuss A, Agyeman J. Mind the gap: why do people act environmentally and what are the barriers  
353 to pro-environmental behavior. *Environ Educ Res.* 2002; 8: 239–260.
- 354
- 355 11. Lorenzoni I, Nicholson-Cole S, Whitmarsh L. Barriers perceived to engaging with climate change  
356 among the UK public and their policy implications. *Global Environ. Change.* 2007; 17: 445–459.
- 357
- 358 12. Shih-Wu L, Wei-Ta F, Shin-Cheng Y, Shiang-Yao L, Tsai H, Chou J-Y, Ng E. A nationwide survey  
359 evaluating the environmental literacy of undergraduate students in Taiwan. *Sustainability.* 2018;  
360 10:1730.
- 361
- 362 13. Satterthwaite D, McGranahan G, Tacoli C. Urbanization and its implications for food and farming.  
363 *Philosophical Transactions of the Royal Society B Biological Sciences.* 2010; 365: 2809–2820.
- 364



- 365 14. Yigitcanlar T, Dizdaroglu D. Ecological approaches in planning for sustainable cities: a review of the  
366 literature. *Global J Environ Sci Manag.* 2015; 1:71–94.  
367
- 368 15. Sun S, Tian L, Cao W, Lai P-C, Wong PPY, Lee RS-y, Mason TG, Krämer A, Wong C-M. Urban climate  
369 modified short-term association of air pollution with pneumonia mortality in Hong Kong. *Sci Tot*  
370 *Environ.* 2019; 646: 618–624.  
371
- 372 16. Larson LR, Jennings V, Cloutier SA. Public parks and wellbeing in urban areas of the United States.  
373 *PLOS ONE.* 2016; 11:e0153211.  
374
- 375 17. Erickson LE, Jennings M. Energy, transportation, air quality, climate change, health nexus:  
376 sustainable energy is good for our health. *AIMS Public Health.* 2017; 4: 47–61.  
377
- 378 18. Erickson LE, Griswold W, Maghirang RG, Urbaszewski BP. Air quality, health and community action. *J*  
379 *Environ Prot.* 2017; 8: 1057–1074.  
380
- 381 19. Carlson K, McCormick S. American adaptation: social factors affecting new developments to address  
382 climate change. *Glob. Environ. Chang.* 2015; 35: 360–367.  
383
- 384 20. District of Columbia Department of Energy and the Environment. Plans and commitments. 2019  
385 [cited 11 September 19]. Available from: <https://doee.dc.gov/service/plans-and-commitments>  
386
- 387 21. District of Columbia Department of Energy and the Environment. Climate ready DC. 2019 [cited 11  
388 September 19]. Available from: <https://doee.dc.gov/climateready>

389

390 22. Kalkstein LS, Sailor D, Shickman K, Sheridan S, Vanos J. Assessing the health impacts of urban heat  
391 island reduction strategies in the District of Columbia. 2013 [cited 2019 September 11]. Available  
392 from:

393 [https://doee.dc.gov/sites/default/files/dc/sites/ddoe/publication/attachments/20131021\\_Urban%20Heat%20Island%20Study\\_FINAL.pdf](https://doee.dc.gov/sites/default/files/dc/sites/ddoe/publication/attachments/20131021_Urban%20Heat%20Island%20Study_FINAL.pdf)

395

396 23. McCright AM. The effects of gender on climate change knowledge and concern in the American  
397 public. *Popul Environ.* 2010; 32: 66–87.

398

399 24. Ogunbode CA, Arnold K. A study of environmental awareness and attitudes in Ibadan, Nigeria. *Hum  
400 Ecol Risk Assess: An Int J.* 2012; 18: 669–684.

401

402 25. Stevenson KT, Peterson MN, Bondell HD, Mertig AG, Moore SE. Environmental, institutional, and  
403 demographic predictors of environmental literacy among middle school children. *PLOS ONE.* 2013;  
404 8:e59519.

405

406 26. Rajapaksa D, Islam M, Managi S. Pro-environmental behavior: The role of public perception  
407 in infrastructure and the social factors for sustainable development. *Sustainability* 2018; 10: 937.

408

409 27. District of Columbia Department of Health. Health equity report: District of Columbia. 2018. [cited  
410 11 September 19]. Available from: <https://app.box.com/s/yspij8v81cxqyeb17gj3uifjumb7ufsw>

411

- 412 28. Turner MA. Poor people and poor neighborhoods in the Washington metropolitan area.  
413 Washington, DC: Urban Institute; 1997.  
414
- 415 29. Mayer FS, McPherson-Frantz I. The connectedness to nature scale: a measure of individuals' feeling  
416 in community with nature. *J Environ Psychol.* 2004; 24:503–515.  
417
- 418 30. Leiserowitz A, Maibach E, Rosenthal S, Kotcher J, Ballew M, Goldberg M, Gustafson A. Climate  
419 change in the American mind: December 2018. Yale University and George Mason University. New  
420 Haven, CT: Yale Program on Climate Change Communication. 2018 [cited 2019 September 11]  
421 Available from: [https://climatecommunication.yale.edu/publications/climate-change-in-the-](https://climatecommunication.yale.edu/publications/climate-change-in-the-american-mind-december-2018/2/)  
422 [american-mind-december-2018/2/](https://climatecommunication.yale.edu/publications/climate-change-in-the-american-mind-december-2018/2/)  
423
- 424 31. Marshall NA, Thiault L, Beeden A, Beeden R, Benham C, Curnock MI, Diedrich A, Gurney GG, Jones L,  
425 Marshall PA, Nakamura N, Pert P. (2019) Our environmental value orientations influence how we  
426 respond to climate change. *Front Psychol.* 2019; 10:1–8.  
427
- 428 32. Lee TM, Markowitz EM, Howe PD, Ko C-Y, Leiserowitz AA. Predictors of public climate change  
429 awareness and risk perception around the world. *Nat Clim Change.* 2015; 5: 1014–1020.  
430
- 431 33. Larson LR, Szczytko R, Bowers EP, Stephens LE, Stevenson KT, Floyd MF. Outdoor time, screen time,  
432 and connection to nature: troubling trends among rural youth? *Environ Behav.* 2018; 1–26.  
433
- 434 34. Ausubel JH. Can technology spare the earth? *Amer. Sci.* 1996; 84: 166–178.  
435

- 436 35. Huesemann MH, Huesemann JA. Will progress in science and technology avert or accelerate global  
437 collapse? A critical analysis and policy recommendations. *Environ Dev Sustain.* 2008; 10: 787–825.  
438
- 439 36. Wolla SA, Sullivan J. Education, income, and wealth. Saint Louis: Page One Economics; 2017.  
440 Available from: [https://files.stlouisfed.org/files/htdocs/publications/page1-econ/2017-01-](https://files.stlouisfed.org/files/htdocs/publications/page1-econ/2017-01-03/education-income-and-wealth_SE.pdf)  
441 [03/education-income-and-wealth\\_SE.pdf](https://files.stlouisfed.org/files/htdocs/publications/page1-econ/2017-01-03/education-income-and-wealth_SE.pdf)  
442
- 443 37. Congressional Black Caucus Foundation. African Americans and climate change: an unequal burden.  
444 Redefining Progress, Washington, DC.  
445
- 446 38. Ebi KL, Balbus J, Kinney PL, Lipp E, Mills D, O’Neill MS, Wilson M. Effects of global change on human  
447 health. In: Gamble, JL, lead author. *Analyses of the Effects of Global Change on Human Health and*  
448 *Welfare and Human Systems.* Washington, DC: Synthesis and Assessment Product 4.6. U.S.  
449 Environmental Protection Agency; 2008. pp. 39-87.  
450
- 451 39. Karl TR, Melillo JM, Peterson TC (eds). *Global climate change impacts in the United States.*  
452 Cambridge: Cambridge University Press, Cambridge; 2009.  
453
- 454 40. Mohai P, Pellow D, Roberts JT. Environmental justice. *Annu Rev Environ Resour.* 2009; 34:405–430.  
455
- 456 41. Nord C, Roey S, Perkins R, Lyons M, Lemanski N, Brown J, Schuknecht J. *The Nation’s Report Card:*  
457 *America’s High School Graduates (NCES 2011-462).* Washington, D.C.: U.S. Department of Education,  
458 National Center for Education Statistics; 2011.  
459

- 460 42. Dietz T, Dan A, Shwom R. Support for climate change policy: Social psychological and social  
461 structural influences. *Rural Sociol.* 2007; 72: 185–214.  
462
- 463 43. Leiserowitz A, Akerlof K. Race, ethnicity and public responses to climate change. New Haven, CT Yale  
464 Program on Climate Change Communication. 2010 [cited 2019 September 25] Available from:  
465 Available at [climatecommunication.yale.edu/publications/](http://climatecommunication.yale.edu/publications/race-ethnicity-and-public-responses-to-climate-change/) race-ethnicity-and-public-responses-to-  
466 climate-change/. Accessed October 16, 2018.  
467
- 468 44. Macias T. Environmental risk perception among race and ethnic groups in the United States.  
469 *Ethnicities.* 2016; 16: 111–129.  
470
- 471 45. Pearson AR, Schuldt JP, Romero-Canyas R, Ballew MT, Larson-Konar D. Diverse segments of the US  
472 public underestimate the environmental concerns of minority and low-income Americans. *Proc Natl*  
473 *Acad Sci USA.* 2018; 115: 12429–12434.  
474
- 475 46. Taylor, DE. The state of diversity in environmental organizations: Mainstream NGOs, foundations,  
476 government agencies. 2014 [cited 2019 September 25] Available from:  
477 <http://www.diversegreen.org/the-challenge/>.  
478
- 479 47. Kreslake JM. Perceived importance of climate change adaptation and mitigation according to social  
480 and medical factors among residents of impacted communities in the United States. *Health Equity*  
481 2019; 3: 124–133.

**Table 1.** Open-ended questions that assessed knowledge and perceptions of people of different educational attainment in Washington, DC, USA about the interconnectedness of natural resources, climate change, economics, and socio-cultural well-being.

| Survey question                                                           | Education (sample size) | Responses (%)     |                        |                |       |      |                       |                    |       | Statistics                              |
|---------------------------------------------------------------------------|-------------------------|-------------------|------------------------|----------------|-------|------|-----------------------|--------------------|-------|-----------------------------------------|
| Can you describe what natural resources are?                              |                         | Natural resources | Creation               | Recycling      | No    |      |                       |                    |       | $\chi^2= 15.4$<br>df = 6<br>$P = 0.018$ |
|                                                                           | Advanced degree (59)    | 84.7              | 1.7                    | 11.9           | 1.7   |      |                       |                    |       |                                         |
|                                                                           | College/trade (219)     | 85.4              | 0.9                    | 12.8           | 0.9   |      |                       |                    |       |                                         |
|                                                                           | High school (177)       | 66.7              | 1.1                    | 30.5           | 1.7   |      |                       |                    |       |                                         |
| What do you consider to be the most important natural resource?           |                         | Air               | Water                  | Soil           | Trees | Land | Energy / fossil fuels | Multiple resources | Other | $\chi^2= 18.8$<br>df = 14<br>$P = 0.17$ |
|                                                                           | Advanced degree (59)    | 11.9              | 47.5                   | 0              | 3.4   | 0    | 11.9                  | 10.2               | 15.2  |                                         |
|                                                                           | College/trade (219)     | 22.4              | 44.1                   | 1.4            | 1.4   | 1.8  | 10.5                  | 6.4                | 15.1  |                                         |
|                                                                           | High school (177)       | 18.6              | 37.9                   | 2.3            | 8.5   | 0    | 7.9                   | 6.2                | 18.6  |                                         |
| Which natural resource has been threatened the most in your neighborhood? |                         | Air               | Water                  | Soil           | Trees | Land | Energy / fossil fuels | Multiple resources | Other | $\chi^2= 15.6$<br>df = 14<br>$P = 0.34$ |
|                                                                           | Advanced degree (59)    | 23.7              | 25.4                   | 0              | 6.8   | 1.7  | 3.4                   | 3.4                | 35.6  |                                         |
|                                                                           | College/trade (219)     | 21.5              | 27.9                   | 0              | 8.7   | 1.8  | 10.0                  | 3.2                | 26.9  |                                         |
|                                                                           | High school (177)       | 14.1              | 23.2                   | 2.8            | 11.3  | 0.6  | 6.8                   | 3.4                | 37.9  |                                         |
| Can you describe what climate change is to you?                           |                         | Weather patterns  | Human cause / reaction | Climate change | No    |      |                       |                    |       | $\chi^2= 12.8$<br>df = 6<br>$P = 0.046$ |
|                                                                           | Advanced degree (59)    | 66.1              | 15.3                   | 11.9           | 6.8   |      |                       |                    |       |                                         |
|                                                                           | College/trade (219)     | 61.6              | 12.3                   | 18.3           | 7.8   |      |                       |                    |       |                                         |
|                                                                           | High school (177)       | 64.4              | 9.0                    | 8.5            | 18.1  |      |                       |                    |       |                                         |

**Table 2.** Close-ended and Likert scale questions/statements that assessed knowledge and perceptions of people of different educational attainment in Washington, DC, USA about the interconnectedness of natural resources, climate change, economics, and socio-cultural well-being.

| Survey question/statement                                                 | Education (sample size) | Responses (%)  |                |         |                   |                   | Statistics                               |
|---------------------------------------------------------------------------|-------------------------|----------------|----------------|---------|-------------------|-------------------|------------------------------------------|
|                                                                           |                         | Strongly agree | Somewhat agree | Neutral | Somewhat disagree | Strongly disagree |                                          |
| I have a strong knowledge of natural resources.                           |                         |                |                |         |                   |                   | $\chi^2 = 11.2$<br>df = 8<br>$P = 0.19$  |
|                                                                           | Advanced degree (59)    | 1.7            | 16.9           | 30.5    | 28.8              | 22.0              |                                          |
|                                                                           | College/trade (219)     | 2.3            | 14.2           | 37.9    | 26.0              | 19.6              |                                          |
|                                                                           | High school (177)       | 9.6            | 16.9           | 34.5    | 22.0              | 16.9              |                                          |
| I think of the natural world as a community to which I belong.            |                         |                |                |         |                   |                   | $\chi^2 = 20.4$<br>df = 8<br>$P = 0.009$ |
|                                                                           | Advanced degree (59)    | 1.7            | 3.4            | 11.9    | 35.6              | 47.5              |                                          |
|                                                                           | College/trade (219)     | 2.7            | 9.1            | 25.6    | 22.4              | 36.5              |                                          |
|                                                                           | High school (177)       | 6.2            | 11.3           | 26.0    | 26.0              | 30.5              |                                          |
| I often feel disconnected from nature.                                    |                         |                |                |         |                   |                   | $\chi^2 = 25.7$<br>df = 8<br>$P = 0.001$ |
|                                                                           | Advanced degree (59)    | 35.6           | 32.2           | 10.2    | 22.0              | 0                 |                                          |
|                                                                           | College/trade (219)     | 25.1           | 26.9           | 23.3    | 14.6              | 10.0              |                                          |
|                                                                           | High school (177)       | 26.6           | 24.9           | 15.8    | 16.4              | 16.4              |                                          |
| My personal welfare is not connected to the welfare of the natural world. |                         |                |                |         |                   |                   | $\chi^2 = 30.0$<br>df = 8<br>$P < 0.001$ |
|                                                                           | Advanced degree (59)    | 52.5           | 18.6           | 16.9    | 6.8               | 5.1               |                                          |
|                                                                           | College/trade (219)     | 32.4           | 27.4           | 21.5    | 12.3              | 6.4               |                                          |
|                                                                           | High school (177)       | 23.2           | 18.6           | 22.0    | 21.5              | 14.7              |                                          |
| Human activities have little influence on natural resources.              |                         |                |                |         |                   |                   | $\chi^2 = 54.0$<br>df = 8<br>$P < 0.001$ |
|                                                                           |                         | Strongly agree | Somewhat agree | Neutral | Somewhat disagree | Strongly disagree |                                          |

|                                                                                     |                      |                |                |         |                   |                   |                                       |
|-------------------------------------------------------------------------------------|----------------------|----------------|----------------|---------|-------------------|-------------------|---------------------------------------|
|                                                                                     | Advanced degree (59) | 64.4           | 13.6           | 6.8     | 8.4               | 6.8               |                                       |
|                                                                                     | College/trade (219)  | 47.9           | 22.4           | 9.6     | 5.9               | 14.2              |                                       |
|                                                                                     | High school (176)    | 19.9           | 15.3           | 22.2    | 17.0              | 25.6              |                                       |
| Technological advances will ensure that we do not make the earth unlivable.         |                      | Strongly agree | Somewhat agree | Neutral | Somewhat disagree | Strongly disagree | $\chi^2 = 19.8$<br>df = 8<br>P = 0.01 |
|                                                                                     | Advanced degree (59) | 15.3           | 27.1           | 28.8    | 25.4              | 3.4               |                                       |
|                                                                                     | College/trade (219)  | 17.4           | 20.5           | 30.6    | 17.8              | 13.7              |                                       |
|                                                                                     | High school (177)    | 15.8           | 11.9           | 23.7    | 31.1              | 17.5              |                                       |
| Humans are severely abusing the environment.                                        |                      | Strongly agree | Somewhat agree | Neutral | Somewhat disagree | Strongly disagree | $\chi^2 = 17.0$<br>df = 8<br>P = 0.03 |
|                                                                                     | Advanced degree (59) | 6.8            | 1.7            | 6.8     | 40.7              | 44.1              |                                       |
|                                                                                     | College/trade (219)  | 2.3            | 6.8            | 10.5    | 25.1              | 55.3              |                                       |
|                                                                                     | High school (177)    | 6.8            | 7.3            | 13.0    | 20.9              | 52.0              |                                       |
| Local environmental concerns are more important than global environmental concerns. |                      | Strongly agree | Somewhat agree | Neutral | Somewhat disagree | Strongly disagree | $\chi^2 = 18.3$<br>df = 8<br>P = 0.02 |
|                                                                                     | Advanced degree (59) | 10.2           | 23.7           | 37.3    | 23.7              | 5.1               |                                       |
|                                                                                     | College/trade (219)  | 20.5           | 22.8           | 32.9    | 14.6              | 9.1               |                                       |
|                                                                                     | High school (177)    | 13.6           | 15.3           | 28.2    | 24.9              | 18.1              |                                       |
| The natural resources in your neighborhood cannot support more people.              |                      | Strongly agree | Somewhat agree | Neutral | Somewhat disagree | Strongly disagree | $\chi^2 = 14.6$<br>df = 8<br>P = 0.07 |
|                                                                                     | Advanced degree (59) | 8.5            | 35.6           | 32.2    | 16.9              | 6.8               |                                       |
|                                                                                     | College/trade (219)  | 12.8           | 19.2           | 33.8    | 24.2              | 10.0              |                                       |
|                                                                                     | High school (177)    | 9.0            | 20.3           | 30.5    | 22.6              | 17.5              |                                       |
| The earth has plenty of natural resources if we just learn how to develop them.     |                      | Strongly agree | Somewhat agree | Neutral | Somewhat disagree | Strongly disagree | $\chi^2 = 18.4$<br>df = 8<br>P = 0.02 |
|                                                                                     | Advanced degree (58) | 1.7            | 10.3           | 17.2    | 46.6              | 24.1              |                                       |
|                                                                                     | College/trade (218)  | 8.3            | 8.7            | 13.8    | 31.2              | 38.1              |                                       |
|                                                                                     | High school (176)    | 3.4            | 7.4            | 19.9    | 26.7              | 42.6              |                                       |



|                                                                                                   |                |                |         |                   |                   |                                        |
|---------------------------------------------------------------------------------------------------|----------------|----------------|---------|-------------------|-------------------|----------------------------------------|
| Humans will eventually learn enough about how nature works to be able to control it.              | Strongly agree | Somewhat agree | Neutral | Somewhat disagree | Strongly disagree | $\chi^2 = 19.4$<br>df = 8<br>P = 0.01  |
| Advanced degree (59)                                                                              | 15.3           | 30.5           | 22.0    | 25.4              | 6.8               |                                        |
| College/trade (219)                                                                               | 19.2           | 19.2           | 21.9    | 27.4              | 12.3              |                                        |
| High school (177)                                                                                 | 12.4           | 15.8           | 20.9    | 25.4              | 25.4              |                                        |
| If things continue on their present course, we will soon experience an environmental catastrophe. | Strongly agree | Somewhat agree | Neutral | Somewhat disagree | Strongly disagree | $\chi^2 = 9.9$<br>df = 8<br>P = 0.27   |
| Advanced degree (59)                                                                              | 5.1            | 6.8            | 15.3    | 40.7              | 32.2              |                                        |
| College/trade (219)                                                                               | 3.2            | 4.6            | 20.0    | 26.9              | 45.2              |                                        |
| High school (177)                                                                                 | 4.5            | 10.2           | 18.6    | 26.0              | 40.7              |                                        |
| There is too much worry about natural resources and not enough about jobs.                        | Strongly agree | Somewhat agree | Neutral | Somewhat disagree | Strongly disagree | $\chi^2 = 49.4$<br>df = 8<br>P < 0.001 |
| Advanced degree (59)                                                                              | 18.6           | 47.5           | 23.7    | 6.8               | 3.4               |                                        |
| College/trade (219)                                                                               | 17.8           | 20.5           | 35.2    | 11.9              | 14.6              |                                        |
| High school (177)                                                                                 | 14.7           | 16.9           | 21.5    | 20.9              | 26.0              |                                        |
| Natural resources in my neighborhood are plentiful.                                               | Strongly agree | Somewhat agree | Neutral | Somewhat disagree | Strongly disagree | $\chi^2 = 14.3$<br>df = 8<br>P = 0.07  |
| Advanced degree (59)                                                                              | 10.2           | 28.8           | 35.6    | 22.0              | 3.4               |                                        |
| College/trade (219)                                                                               | 16.0           | 30.6           | 33.3    | 14.6              | 5.5               |                                        |
| High school (177)                                                                                 | 15.3           | 22.0           | 27.1    | 21.5              | 14.1              |                                        |
| Climate change has a negative impact on natural resources in my neighborhood.                     | Strongly agree | Somewhat agree | Neutral | Somewhat disagree | Strongly disagree | $\chi^2 = 4.7$<br>df = 8<br>P = 0.79   |
| Advanced degree (59)                                                                              | 3.4            | 13.6           | 23.7    | 35.6              | 23.7              |                                        |
| College/trade (219)                                                                               | 4.6            | 9.1            | 31.5    | 27.9              | 26.9              |                                        |
| High school (177)                                                                                 | 4.5            | 15.3           | 24.9    | 28.2              | 27.1              |                                        |
| I understand that the natural environment                                                         | Strongly agree | Somewhat agree | Neutral | Somewhat disagree | Strongly disagree | $\chi^2 = 8.5$<br>df = 8               |

|                                                                                                                        |                      |                             |                                 |                                      |                                   |                                    |                    |                                          |
|------------------------------------------------------------------------------------------------------------------------|----------------------|-----------------------------|---------------------------------|--------------------------------------|-----------------------------------|------------------------------------|--------------------|------------------------------------------|
| impacts my individual health.                                                                                          |                      |                             |                                 |                                      |                                   |                                    |                    | $P = 0.38$                               |
|                                                                                                                        | Advanced degree (59) | 3.4                         | 6.8                             | 13.6                                 | 25.4                              | 50.8                               |                    |                                          |
|                                                                                                                        | College/trade (219)  | 1.8                         | 1.8                             | 10.5                                 | 28.8                              | 57.1                               |                    |                                          |
|                                                                                                                        | High school (177)    | 4                           | 8.5                             | 17.5                                 | 23.2                              | 46.9                               |                    |                                          |
| Degraded natural resources in my neighborhood has a negative impact on (select all that apply):                        |                      | you or your family's income | you or your family's health     | other parts of the local environment | your cultural or social practices | the aesthetics of the neighborhood | your recreation    | $\chi^2 = 22.5$<br>df = 10<br>$P = 0.01$ |
|                                                                                                                        | Advanced degree (59) | 32.2                        | 81.4                            | 69.5                                 | 67.8                              | 66.1                               | 76.3               |                                          |
|                                                                                                                        | College/trade (219)  | 35.6                        | 76.3                            | 66.2                                 | 42.0                              | 53.9                               | 52.1               |                                          |
|                                                                                                                        | High school (177)    | 53.7                        | 65.5                            | 56.5                                 | 37.3                              | 40.1                               | 44.6               |                                          |
| Which people or groups do you think have the most responsibility for improving natural resources in your neighborhood? |                      | Individuals                 | Community organizations         | Businesses                           | Environmental groups              | District government                | Federal government | $\chi^2 = 17.3$<br>df = 10<br>$P = 0.07$ |
|                                                                                                                        | Advanced degree (59) | 35.6                        | 5.1                             | 16.9                                 | 15.3                              | 13.6                               | 13.6               |                                          |
|                                                                                                                        | College/trade (219)  | 36.1                        | 5.0                             | 9.1                                  | 7.3                               | 15.5                               | 26.9               |                                          |
|                                                                                                                        | High school (177)    | 35.6                        | 6.2                             | 5.1                                  | 9.0                               | 13.6                               | 30.5               |                                          |
| How often do you spend time doing outdoor activities?                                                                  |                      | Never                       | Very infrequently (once a week) | Occasionally (3 days a week)         | Frequently (5 days a week)        | Almost daily (>5 days a week)      |                    | $\chi^2 = 6.7$<br>df = 8<br>$P = 0.57$   |
|                                                                                                                        | Advanced degree (59) | 1.7                         | 13.6                            | 30.5                                 | 27.1                              | 27.1                               |                    |                                          |
|                                                                                                                        | College/trade (219)  | 7.3                         | 11.0                            | 31.1                                 | 22.4                              | 28.3                               |                    |                                          |
|                                                                                                                        | High school (177)    | 5.6                         | 15.3                            | 29.4                                 | 17.5                              | 32.2                               |                    |                                          |
| Are you a member of a community or faith-based organizations in your neighborhood?                                     |                      | Yes                         | No                              |                                      |                                   |                                    |                    | $\chi^2 = 35.6$<br>df = 2<br>$P < 0.001$ |
|                                                                                                                        | Advanced degree (59) | 33.9                        | 66.1                            |                                      |                                   |                                    |                    |                                          |
|                                                                                                                        | College/trade (219)  | 67.1                        | 32.9                            |                                      |                                   |                                    |                    |                                          |
|                                                                                                                        | High school (177)    | 72.3                        | 27.7                            |                                      |                                   |                                    |                    |                                          |

| How often does your community or faith-based organization spend time doing outdoor activities? | Never | Very infrequently (once a week) | Occasionally (3 days a week) | Frequently (5 days a week) | Almost daily (>5 days a week) | $\chi^2 = 11.5$<br>df = 8<br>$P = 0.17$ |
|------------------------------------------------------------------------------------------------|-------|---------------------------------|------------------------------|----------------------------|-------------------------------|-----------------------------------------|
| Advanced degree (38)                                                                           | 15.8  | 34.2                            | 26.3                         | 10.5                       | 13.2                          |                                         |
| College/trade (72)                                                                             | 9.7   | 47.2                            | 20.8                         | 16.7                       | 5.6                           |                                         |
| High school (49)                                                                               | 8.2   | 36.7                            | 24.5                         | 18.4                       | 12.2                          |                                         |

**Table 3.** Responses of people of different educational attainment in Washington, DC, USA when asked “For each of the following categories, answer whether you think the District government is spending too little, about the right amount, too much, undecided.”

| Category                     | Education (sample size) | Responses (%) |                        |          |           | Statistics     |
|------------------------------|-------------------------|---------------|------------------------|----------|-----------|----------------|
|                              |                         | Too little    | About the right amount | Too much | Undecided |                |
| Health                       | Advanced degree (59)    | 54.2          | 30.5                   | 5.1      | 10.2      | $\chi^2 = 2.6$ |
|                              | College/trade (219)     | 58.9          | 26.5                   | 2.7      | 11.9      | df = 6         |
|                              | High school (177)       | 62.1          | 26.5                   | 2.7      | 11.9      | $P = 0.85$     |
| Workforce development        | Advanced degree (59)    | 49.2          | 33.9                   | 5.1      | 11.9      | $\chi^2 = 1.7$ |
|                              | College/trade (219)     | 52.5          | 34.2                   | 3.7      | 9.6       | df = 6         |
|                              | High school (177)       | 54.2          | 28.8                   | 6.2      | 10.7      | $P = 0.95$     |
| Education                    | Advanced degree (59)    | 69.5          | 22.0                   | 1.7      | 6.8       | $\chi^2 = 3.3$ |
|                              | College/trade (219)     | 64.4          | 26.0                   | 1.8      | 7.8       | df = 6         |
|                              | High school (177)       | 61.6          | 27.7                   | 4.5      | 6.2       | $P = 0.78$     |
| Protecting natural resources | Advanced degree (59)    | 57.6          | 25.4                   | 0        | 16.9      | $\chi^2 = 6.5$ |
|                              | College/trade (219)     | 58.4          | 23.3                   | 4.1      | 14.2      | df = 6         |
|                              | High school (177)       | 54.2          | 26.0                   | 6.2      | 13.6      | $P = 0.37$     |
| Developing natural resources | Advanced degree (59)    | 57.6          | 27.1                   | 1.7      | 13.6      | $\chi^2 = 9.3$ |
|                              | College/trade (219)     | 55.7          | 22.4                   | 5.0      | 16.9      | df = 6         |
|                              | High school (177)       | 46.9          | 26.6                   | 10.7     | 15.8      | $P = 0.16$     |
| Law enforcement              | Advanced degree (59)    | 28.8          | 30.5                   | 23.7     | 16.9      | $\chi^2 = 6.7$ |
|                              | College/trade (219)     | 30.6          | 26.5                   | 32.9     | 10.0      | df = 6         |
|                              | High school (177)       | 32.8          | 25.4                   | 33.9     | 7.9       | $P = 0.35$     |
| Drug rehabilitation          | Advanced degree (59)    | 52.5          | 25.4                   | 5.1      | 16.9      | $\chi^2 = 3.1$ |
|                              | College/trade (219)     | 55.7          | 20.1                   | 6.8      | 17.4      | df = 6         |
|                              | High school (177)       | 55.4          | 22.6                   | 9.6      | 12.4      | $P = 0.79$     |
